1  
2  
3  
4  
5  
6  
7  
8  
9  
10  
11  
12  
13  
14  
15  
16  
17

## Association analysis of loci implied in “buffering” epistasis

Andrés Legarra<sup>\*</sup>, Zulma G. Vitezica<sup>\*</sup>, Marina Naval-Sánchez<sup>\*\*</sup>, John Henshall<sup>†</sup>, Fernanda Raidan<sup>\*\*</sup>, Yutao Li<sup>\*\*</sup>, Karin Meyer<sup>‡</sup>, Nicholas J. Hudson<sup>§</sup>, Laercio R. Porto-Neto<sup>\*\*</sup> and Antonio Reverter<sup>\*\*</sup>

<sup>\*</sup>INRA/INPT, UMR 1388 GenPhySE, F-31326 Castanet-Tolosan, France.

<sup>\*\*</sup>CSIRO Agriculture & Food, 306 Carmody Rd., St. Lucia, Brisbane, QLD 4067, Australia.

<sup>†</sup>Cobb-Vantress Inc., Siloam Springs, Arkansas 72761-1030, USA.

<sup>‡</sup>Animal Genetics and Breeding Unit, University of New England, Armidale, NSW 2351, Australia.

<sup>§</sup>School of Agriculture and Food Sciences, The University of Queensland, Gatton, QLD 4343, Australia

18    Running title:                    Epistasis in association studies

19

20    Key words:                        Epistasis, genome-wide association studies, beef cattle

21

22    Corresponding Authors:        Andres Legarra [andres.legarra@inra.fr](mailto:andres.legarra@inra.fr)

23

24

25

26  
27  
28  
29  
30  
31  
32  
33  
34  
35  
36  
37  
38  
39  
40  
41  
42  
43  
44  
45  
46  
47  
48  
49  
50

## ABSTRACT

The existence of buffering mechanisms is an emerging property of biological networks, and this results in the possible existence of “buffering” loci, that would allow buildup of robustness through evolution. So far, there are no explicit methods to find loci implied in buffering mechanisms. However, buffering can be seen as interaction with genetic background. Here we develop this idea into a tractable model for quantitative genetics, in which the buffering effect of one locus with many other loci is condensed into a single (statistical) effect, multiplicative on the total (statistical) additive genetic effect. This allows easier interpretation of the results, and it also simplifies the problem of detecting epistasis from quadratic to linear in the number of loci. Armed with this formulation, we construct a linear model for genome-wide association studies that estimates, and declares significance, of multiplicative epistatic effects at single loci. The model has the form of a variance components, norm reaction model and likelihood ratio tests are used for significance. This model is a generalization and explanation of previous ones. We then test our model using bovine data: Brahman and Tropical Composite animals, phenotyped for body weight at yearling and genotyped up to ~770,000 Single Nucleotide Polymorphisms (SNP). After association analysis and based on False Discovery Rate rules, we find a number of loci with buffering action in one, the other, or both breeds; these loci do not have significant statistical additive effect. Most of these loci have been reported in previous studies, either with an additive effect, or as footprints of selection. We identify epistatic SNPs present in or near genes encoding for proteins that are functionally enriched for peptide activity and transcription factors reported in the context of signatures of selection in multi-breed cattle population studies. These include loci known to be associated with coat color, fertility and adaptation to tropical environments. In these populations we found loci that have a non-significant statistical additive effect but a significant epistatic effect. We argue that the

51 discovery and study of loci associated with buffering effects allows attacking the difficult  
52 problems, among others, of release of maintenance variance in artificial and natural selection,  
53 of quick adaptation to the environment, and of opposite signs of marker effects in different  
54 backgrounds. We conclude that our method and our results generate promising new  
55 perspectives for research in evolutionary and quantitative genetics based on the study of loci  
56 that buffer effect of other loci.

57

58

59

## INTRODUCTION

60 Epistasis is a biological phenomenon that is increasingly being given attention in  
61 genetics. One of the biological phenomena in which epistasis is likely implied is “buffering”  
62 (Visser *et al.* 2003; Flatt 2005), a mechanism that would allow buildup of robustness through  
63 evolution (see (Flatt 2005) for examples). A known example is chaperones (Visser *et al.*  
64 2003; Kitano 2004). Loci implied in buffering would mitigate heritable perturbations. For  
65 instance, for a trait with intermediate optima, too high total genotypic values would not be  
66 expressed. The existence of buffering mechanisms is an emerging propriety of networks  
67 (Mackay 2014) and therefore, because biochemical and gene networks are pervasive in  
68 nature, buffering loci must exist. Moreover, the existence of segregating (not fixed) buffering  
69 epistatic loci would explain several phenomena that are not well understood: environmental  
70 robustness, release of additive variance after disturbing events, (Visser *et al.* 2003; Flatt  
71 2005), maintenance of genetic variance in selected populations previously under stabilizing  
72 selection (Gimelfarb 1989), and opposite signs of GWAS associations in different populations  
73 (Huang *et al.* 2012).

74 There are so far no explicit methods to detect loci implied in buffering mechanisms.  
75 However, buffering can be understood as interaction with genetic background (Visser *et al.*

76 2003), and methods to detect epistasis against genetic backgrounds have been proposed  
77 (Jannink 2007). There is, in addition, increasing evidence of dependency of gene substitution  
78 effects in genetic background (Hansen 2013). More recently, a method that implicitly detects  
79 loci in interaction with genetic backgrounds has been presented (Crawford *et al.* 2017).  
80 However, in neither of these cases the connection with buffering mechanisms has been  
81 explicitly shown or put forward.

82 In this work, we present for the first time, to our knowledge, a formal quantitative  
83 genetics framework for the phenomenon of “buffering epistasis”, derive efficient methods for  
84 genome-wide association studies, and perform association analyses for buffering loci in two  
85 real tropical cattle populations. Next, we present the biological discoveries following these  
86 analyses, showing that significant hits in the association analysis for buffering epistasis have  
87 been reported previously either as having an additive effect or as harboring selection  
88 signatures for tropical adaptation.

89

90

91

## MATERIAL AND METHODS

### *Biometrical model.*

93 First, we start our development with a rather general model for epistasis. Then, we  
94 show how part of the epistatic variability in this general model can be reformulated as a sum  
95 of terms of a buffering action of the “buffering” epistatic locus towards the effect of all other  
96 loci, whereas the rest of the epistatic variation is ignored. Then we reformulate the sum of  
97 buffering actions in terms of a single buffering effect and overall additive genetic value.  
98 Armed with this formulation, we describe two methods of analysis, one exact and one  
99 approximate. We generally follow existing notations (Mäki-Tanila and Hill 2014).

100 Consider the total genotypic effect of one individual as the sum of additive (statistical)  
 101 effects of all loci ( $\alpha_j$  at locus  $j$ ), plus all possible additive by additive (statistical) interactions  
 102 ( $(\alpha\alpha)^{ij}$  for the pairwise interaction between loci  $i$  and  $j$ ):

$$g = \mu + \sum_j z_j \alpha_j + \sum_i \sum_j z_i z_j (\alpha\alpha)_{ij}$$

103  
 104 Note that these statistical pairwise interactions capture the effect of *functional*  
 105 pairwise and higher-order interactions (Mäki-Tanila and Hill 2014). Gene content indicators  
 106  $z_i$  are centered with respect to the population, so  $E(g) = \mu$ ,  $E(\sum_i z_i \alpha_i) = 0$  and  
 107  $E(\sum_i \sum_j z_i z_j (\alpha\alpha)_{ij}) = 0$  across the population. The model so composed has  $n$  additive and  
 108  $n^2$  additive by additive effects, and they are orthogonal by construction (Cockerham 1954;  
 109 Álvarez-Castro and Carlborg 2007). Consider Example in Table 1. Allele B is a “shrinker” or  
 110 “bufferer” allele whereas allele b is a “magnifier” allele.

111

112 **Table 1. Effect of buffering locus B/b on additive locus c/C**

|    | CC | Cc   | cc   |
|----|----|------|------|
| BB | 0  | 0.35 | 0.70 |
| Bb | 0  | 1.05 | 2.10 |
| bb | 0  | 3.15 | 6.30 |

113

114 A buffering effect can be seen as a multiplication of the additive effect of locus  $j$   
 115 (locus C/c in Table 1) by a quantity determined by its interaction with (buffering) locus  $i$   
 116 (locus B/b in Table 1), in other words,  $(\alpha\alpha)^{ij} = k_{ij} \alpha_j$ . In Table 1,  $k_{ij} = 3$ . For instance, the

117 effect of allele “c” in a genetic background “bb” is to increase 3.15 units per one unit of gene  
118 content, whereas in a “BB” background the increase is only of 0.35 units.

119 In our work, we assume that  $k_{ij}$  (the buffering effect of locus  $i$  on locus  $j$ ) can be  
120 approximated, for all pairs of locus  $i$  with other loci  $j$ , by a locus-specific  $k_i$  value. In other  
121 words, for a given locus  $i$ , the  $n$  interactions  $(\alpha\alpha)^{ij}$  can be approximated by  $(\alpha\alpha)^{ij} \approx k_i\alpha_j$ .  
122 Alternatively, the value  $k_i$  can be seen as the regression coefficient of the equation  $(\alpha\alpha)^{ij} =$   
123  $k_i\alpha_j + \epsilon_{ij}$ . This simplification allows a reduction in number of parameters (from  $n^2$   
124 interactions to  $n$  buffering effects), and, more important, allows focusing on individual  
125 buffering loci instead of pairs of loci. In other words, we will find loci which tend to buffer in  
126 the same manner across genome.

127 Thus, for the purpose of detecting buffering epistatic loci, we model the total  
128 genotypic value (ignoring remaining epistatic actions) of an individual as

$$g = \mu + \sum_j z_j \alpha_j + \sum_i \sum_j z_i z_j k_i \alpha_j$$

129 Which after some algebra and because  $u = \sum_j z_j \alpha_j$ , becomes

$$g = \mu + u + \sum_i z_i k_i u$$

130 Where  $u$  stands for the (statistical) additive genetic value, also known as breeding  
131 value in animal genetics. For GWAS purposes, we will use a model considering only the  $i$ -th  
132 loci:

$$133 \quad g = \mu + u + z_i k_i u \quad (1)$$

134 Interestingly, the term  $z_i k_i u$  can be seen as an interaction of locus  $i$  with all genome,  
135 as described by (Visser *et al.* 2003; Flatt 2005). This model was presented by Jannink (2007)  
136 as modelling interaction of locus with all genome, but without stating that it is in fact  
137 modelling buffering epistatic action. The same model was presented by Crawford *et al.*

138 (2017)) without formalizing the kind of epistatic action, and (in particular) lacking an  
139 orthogonal model.

140 A feature of model in (1) is that because  $E(u) = 0$ , the observed additive effect of  
141 locus  $i$  changes sign in the extremes of the distribution of  $u$ . Imagine for instance that the  
142 buffering effect of locus  $i$  (B/b) is  $k_i = -0.2$  and  $p = \text{freq}(B) = 0.6$ . For an individual with  
143  $u = 20$  and carrier of  $BB$  genotype,  $z_i = 2 - 2p = 0.8$ , the epistatic effect is negative:  
144  $k_i z_i u = -0.2 \times 0.8 \times 20 = -3.2$ , and the total genotypic value is  $g = 20 - 3.2 = 16.8$ .  
145 Similarly, for an individual with  $u = 0$ , the epistatic locus has no effect (there is no  
146 buffering); for an individual with  $u = -20$ , the epistatic effect is positive and *increases* total  
147 genotypic value. In all cases, carriers of the “BB” genotype are regressed towards 0.

148 Plugging (1) into a linear model, a GWAS model would be

$$149 \quad \mathbf{y} = \mathbf{X}\mathbf{b} + \mathbf{u} + k_i \mathbf{Z}_i^* \mathbf{u} + \mathbf{e} \quad (2)$$

150 Where  $\mathbf{y}$  are quantitative phenotypes of interest,  $\mathbf{b}$  is the fixed effects vector (e.g. herd-  
151 sex-year contemporary group),  $\mathbf{X}$  is a design matrix relating records to fixed effects,  $\mathbf{Z}_i^*$  is a  
152 matrix whose diagonal contains  $\mathbf{z}_i$ , the coding of the different genotypes at locus  $i$ . Note that  
153 the term  $k_i \mathbf{Z}_i^* \mathbf{u} = k_i \sum_{j=1,n} \mathbf{z}_i \odot \mathbf{z}_j \alpha_j$  is equivalent to Eq. 1 in Crawford et al. (2017) and their  
154 terms  $\alpha_j$  are equivalent to our terms  $k_i \alpha_j$ . However, they do not present their model in terms  
155 of buffering, and their matrices  $\mathbf{x}$  ( $\mathbf{z}$  in our notation) are not centered, which leads to lack of  
156 orthogonality of their model (Álvarez-Castro and Carlborg 2007; Vitezica et al. 2017).

157 Our model in (2), is not usable because both the terms  $k_i$  and  $\mathbf{u}$  implied in the  
158 regression are unknown. However, the epistatic component  $\boldsymbol{\phi} = k_i \mathbf{Z}_i^* \mathbf{u}$  defines a covariance  
159 matrix for  $\boldsymbol{\phi}$  in the  $i$ -th locus:

$$\text{Cov}(\boldsymbol{\phi}) = \mathbf{Z}_i^* \mathbf{G} \sigma_u^2 k_i^2 \mathbf{Z}_i^{*'}$$



160 which suggests a linear model with the form  $\mathbf{y} = \mathbf{X}\mathbf{b} + \mathbf{u} + \boldsymbol{\phi} + \mathbf{e}$ , with covariance as above  
 161 (Jannink 2007; Crawford *et al.* 2017). Unfortunately, GWAS tests with this formulation imply  
 162 computing and inverting  $Cov(\boldsymbol{\phi})$  matrix at each locus (which is computing intensive) and  
 163 can result in lack of convergence (Crawford *et al.*, 2017). We instead propose an equivalent  
 164 formulation that uses

$$\mathbf{g} = \mathbf{u} + \boldsymbol{\phi} = \mathbf{u} + \mathbf{Z}_i^* \mathbf{u}^i$$

165 where  $\mathbf{u}^i = k_i \mathbf{u}$ . We have therefore defined a random effect,  $\mathbf{u}^i$ , which multiplies real values  
 166 given by the covariable  $\mathbf{Z}_i^*$ . This is known as a reaction norm or random regression model  
 167 (Laird and Ware 1982; Schaeffer 2004). Using this formulation, there are two additive genetic  
 168 traits in this model: a general additive trait  $\mathbf{u}$  with variance  $\mathbf{G}\sigma_u^2$ , where  $\mathbf{G}$  is a relationship  
 169 matrix (Wright 1922; VanRaden 2008) and a transformation of the buffering action of locus  $i$   
 170 into another additive trait:  $\mathbf{u}^i = \mathbf{u}k_i$ ,  $Var(\mathbf{u}^i) = \mathbf{G}\sigma_u^2 k_i^2$ . The joint covariance matrix is:

$$171 \quad Var \begin{pmatrix} \mathbf{u} \\ \mathbf{u}^i \end{pmatrix} = \begin{pmatrix} \sigma_u^2 & k_i \sigma_u^2 \\ k_i \sigma_u^2 & k_i^2 \sigma_u^2 \end{pmatrix} \otimes \mathbf{G} = \mathbf{G}_0 \otimes \mathbf{G}$$

172 where  $\begin{pmatrix} \sigma_u^2 & k_i \sigma_u^2 \\ k_i \sigma_u^2 & k_i^2 \sigma_u^2 \end{pmatrix} = \mathbf{G}_0$  is a non-full rank matrix because  $\mathbf{u}^i = \mathbf{u}k_i$ , and  $\otimes$  indicates the  
 173 Kronecker product. Thus the final linear model, considering the epistatic interaction of locus  $i$   
 174 with all other loci, is

$$\mathbf{y} = \mathbf{X}\mathbf{b} + \mathbf{u} + \mathbf{Z}_i^* \mathbf{u}^i + \mathbf{e}$$

175 with  $Var \begin{pmatrix} \mathbf{u} \\ \mathbf{u}^i \end{pmatrix} = \begin{pmatrix} \sigma_u^2 & k_i \sigma_u^2 \\ k_i \sigma_u^2 & k_i^2 \sigma_u^2 \end{pmatrix} \otimes \mathbf{G} = \mathbf{G}_0 \otimes \mathbf{G}$ . This model can be used in an exact method  
 176 as described below.

177

178 ***Exact maximum likelihood method***

179 The exact method proceeds by likelihood ratio test of the two-alternative hypothesis,  
180 using random regression with the Model  $H_1$ :

$$181 \quad \mathbf{y} = \mathbf{X}\mathbf{b} + \mathbf{z}_i\alpha_i + \mathbf{u} + \mathbf{Z}_i^*\mathbf{u}^i + \mathbf{e} \quad (3)$$

182 and a simpler model excluding random regression with the Model  $H_0$ :

$$183 \quad \mathbf{y} = \mathbf{X}\mathbf{b} + \mathbf{z}_i\alpha_i + \mathbf{u} + \mathbf{e} \quad (4)$$

184 Where the actual parameter being tested is  $k_i^2\sigma_u^2 \neq 0$ . The regression on gene content  
185  $\mathbf{z}_i\alpha_i$  corrects for eventual statistical additive (not epistatic) effects of locus  $i$ . Parameters are  
186 estimated by REML (Patterson and Thompson 1971).

187 After fitting the two models, the likelihood ratio test of the competing models is  
188 distributed as a mixture of 0 and 1 degrees of freedom chi-square, from which  $P$ -values can  
189 be obtained. In addition, from the estimated covariance matrix  $\mathbf{G}_0$  estimated under  $H_1$ , the  
190 estimated buffering epistatic effect can be obtained as:

$$191 \quad \hat{k}_i = \widehat{\mathbf{G}}_0[2,2]/\widehat{\mathbf{G}}_0[1,2]. \quad (5)$$

192 Contrary to Crawford *et al.* (2017) matrix  $\mathbf{G}$  has to be computed and inverted only  
193 once, because inclusion of the  $i$ -th locus has zero influence on the result (Gianola *et al.* 2016)  
194 and the matrix  $\mathbf{Z}_i^*\mathbf{G}\sigma_u^2\mathbf{Z}_i^{*'} is never explicitly computed. This results in great savings of  
195 computing time. Matrix  $\mathbf{G}_0$  is a non-full rank matrix, which slows down convergence. An  
196 easy solution is to use a reduced rank model fitting one principal component (Meyer and  
197 Kirkpatrick 2005) as implemented in Wombat (Meyer 2007). Convergence takes a few  
198 iterations in this case compared to hundreds using a standard REML algorithm. We conceived  
199 two approximate methods that will not be reported here but whose description can be found at  
200 (Reverter *et al.* 2018).$

201

202 ***Animals, phenotypes and genotypes***

203 Animals, phenotypes and genotypes used in this study were a subset of those used in  
204 Raidan *et al.* (2018). In brief, we used data of 2,111 Brahman (BB) and 2,550 Tropical  
205 Composite (TC) cows and bulls genotyped using either the BovineSNP50 (Matukumalli *et al.*  
206 2009) ) or the BovineHD (Illumina Inc., San Diego, CA) that includes more than 770,000  
207 SNP. Animals that were genotyped with the lower density array had their genotypes imputed  
208 to higher density as described previously by Bolormaa *et al.* (2014). SNPs were mapped to  
209 the ARS-UCD1.2 bovine genome assembly. After selecting autosomal SNP with minor allele  
210 frequency (MAF) > 1%, we retained 651,253 SNPs for BB and 689,818 for TC. We used  
211 body weight at yearling (YWT) as the phenotype of interest. The average, minimum and  
212 maximum YWT (kg) were 227.7, 115 and 353 kg for BB; and 247.07, 120.5 and 394.5 kg for  
213 TC. Moreover, the average, minimum and maximum age at YWT was 360, 302 and 416 days  
214 for BB; and 361, 319 and 403 days for TC.

215

216 ***False discovery rate (FDR)***

217 Following Bolormaa *et al.* (2014) and with equivalent original derivations from Storey  
218 (2002), FDR was calculated as:

$$\text{FDR} = \frac{P \left(1 - \frac{A}{T}\right)}{\left(\frac{A}{T}\right) (1 - P)}$$

219 Where  $P$  is the  $P$ -value tested,  $A$  is the number of SNP that were significant at the  $P$ -  
220 value tested, and  $T$  is the total number of SNP tested ( $T = 651,253$  and  $689,818$  for BB and  
221 TC, respectively).

222

## 223 ***Implementation***

224 We implemented the analyses using shell scripts to manipulate the data and Wombat  
225 (Meyer 2007) for the REML analyses. Markers were analyzed in parallel in the exact analyses  
226 in the Genotoul Toulouse bioinfo platform; wall clock computing time was approximately 4  
227 days for the exact analysis run in parallel, and a few minutes for the fast approximate one (see  
228 Appendix).

229

## 230 ***Data Availability Statement***

231 The minimal raw data is the SNP genotype data, phenotypes and metadata (eg. sex,  
232 herd, year) for 4,661 cattle and 729,068 SNP genotypes. These raw data are part of the Beef  
233 CRC project (<http://www.beefcrc.com/>) and are co-owned with Meat and Livestock Australia,  
234 and can be made available upon reasonable request and subject to the agreement of the  
235 owners. Any parties seeking access to the raw data should contact Dr. Antonio Reverter  
236 (toni.reverter-gomez@csiro.au or +61732142392).

237

## 238 **RESULTS**

239 The exact method took ~4 day in a parallel cluster running ~100 process  
240 simultaneously. Computation time for a single marker consist of roughly 1 minute. Note that  
241 if a medium density chip had been used (50,000 markers instead of ~600,000), computational  
242 times divide by an order of magnitude. There is considerable room for improvement of the  
243 computational methods, because most of the time is spent reading and manipulating text files.

244

## 245 **RESULTS – Brahman (BB) and Tropical Composite (TC) Populations**

246 Table 2 presents the number of significant SNP and FDR at various *P*-value  
247 thresholds. At any given *P*-value, the number of significant SNP was lower in BB than in TC.

248 As a result, the FDR was lower in TC than in BB for a given  $P$ -value. For instance, at  $P$ -value  
249  $< 0.0001$  the FDR was 9.83% and 4.38% for BB and TC, respectively. The higher number of  
250 epistatic SNPs identified in the TC compared to the BB population was attributed to the  
251 distinct allele frequencies observed in the two populations. Across all SNPs, the first  
252 (reference) allele was found to be either mostly absent (reference allele frequency near 0) or  
253 nearly fixated (reference allele frequency near 1) in the BB population, while intermediate  
254 allele frequencies (highly-polymorphic and hence more informative SNP) were predominant  
255 in the TC population (Figure 2 in (Reverter *et al.* 2017)). In other words, the distribution of  
256 allele frequencies in BB are U-shaped.

257 Figure 1 shows the Manhattan plots for the GWAS for additive and epistatic effects in  
258 the BB and TC populations. The most likely candidate gene in the most significantly  
259 associated regions are also given in Figure 1. It can already be noted that additive and  
260 epistatic gene effects are mutually orthogonal.

261 In the BB population, the strongest significance for epistatic effect corresponded to  
262 SNP BovineHD1700017822 mapped to 60,216,894 bp of BTA17 at 11,627 bp of the coding  
263 region of *TBX5* (T-box 5 transcription factor) and with an estimated epistatic effect of -0.533  
264 ( $-\text{Log}_{10}(P\text{-value}) = 6.849$ ). The corresponding human chromosome segment is involved in  
265 ulnar mammary syndrome (Klopocki *et al.* 2006), and a recent large meta-GWAS study  
266 reveal *TBX5* as a candidate gene for mammary gland morphology in Fleckvieh cattle (Pausch  
267 *et al.* 2016).

268 Following *TBX5*, we found the second strongest signal for epistasis in BB to SNP  
269 BovineHD2000011094 (estimated epistatic effect of -0.282 and  $-\text{Log}_{10}(P\text{-value}) = 6.669$ )  
270 mapped to 38.97 Mb of BTA20 and 2.6 kb downstream of prolactin receptor (*PRLR*). *PRLR* is  
271 in a region captured by selection signatures for adaptation in beef cattle (Boitard *et al.* 2016)

272 and mutations on this gene have been found to have a major genetic effect on hair length and  
273 coat structure characteristics of cattle (Littlejohn *et al.* 2014; Porto-Neto *et al.* 2018).

274 The third strongest signal corresponded to SNP BovineHD2300014569 mapped to  
275 50.10 Mb of BTA23 in the coding region of *PRPF4B* (*pre-mRNA processing factor 4B*) with  
276 an estimated effect of 0.324 ( $-\text{Log}_{10}(P\text{-value}) = 6.309$ ). With no reported function in the  
277 context of bovine breeding and genetics, *PRPF4B* is an essential kinase induced by estrogen  
278 (Lahsae *et al.* 2016) and its loss promotes sustained growth factor signaling (Corkery *et al.*  
279 2018). Quite strikingly, loci on the coding region of *SPEN* (SNP BovineHD1600014616,  
280 epistatic effect = 0.213,  $-\text{Log}_{10}(P\text{-value}) = 2.137$ ) and *GHR* (SNP BovineHD2000009203,  
281 epistatic effect = 0.782,  $-\text{Log}_{10}(P\text{-value}) = 2.234$ ) were found to be significantly epistatic in  
282 our study. *SPEN* is an estrogen receptor cofactor and a key regulator of fat deposition and  
283 energy balance (Hazegh *et al.* 2017). Furthermore, a SNP-based co-association gene network  
284 by our group previously identified *ESRRG* and *PPARG* as key regulators of age at puberty in  
285 Brahman cows (Fortes *et al.* 2013).

286 In the TC population, we found the strongest signal in SNP BovineHD0100028404  
287 (epistatic effect = 0.294,  $-\text{Log}_{10}(P\text{-value}) = 9.261$ ) mapped to 98.71 Mb of BTA1 in the  
288 coding region of *LOC100139843* (*mCG140927-like*) with limited information known about  
289 its function, but quite strikingly, recently reported to be associated with age at puberty in  
290 Angus bulls (Fernández *et al.* 2016). We found the second and third strongest signal in the  
291 coding region of *ZNF521* (SNP BovineHD2400008618, mapped to BTA24:31,439,030 with  
292 and estimated epistatic effect = -0.260,  $-\text{Log}_{10}(P\text{-value}) = 7.432$ ) and *AGTRI* (SNP  
293 BovineHD0100034098 mapped to BTA1: 119,483,491 with and estimated epistatic effect = -  
294 0.194,  $-\text{Log}_{10}(P\text{-value}) = 3.204$ ), respectively. The loci on *ZNF521* has been found to  
295 associate with female fertility in Nordic Red cattle, consisting of three different populations  
296 from Finland, Sweden and Denmark (Höglund *et al.* 2015). Whereas the role in bovine

297 fertility of *AGTR1* (*angiotensin II receptor type 1*) has long been documented (Portela *et al.*  
298 2008; Marey *et al.* 2016) including its differential expression at the level of the oviduct  
299 between *Bos taurus* and *Bos indicus* cattle (Fontes *et al.* 2018).

300 The relationship between epistatic and additive effect in each population is illustrated  
301 in Figure 2. It can be seen that effects are empirically orthogonal as expected. Note that unlike  
302 additive effects, epistatic effects have no units as they are defined as a multiplier on additive  
303 effects. Figure 3 shows the relationship between the epistatic effects in both populations, BB  
304 and TC. Significant simultaneously in both populations were 42 SNPs of which 24 were  
305 located within 50 kb of the coding region of known genes and these are listed in Table 2.  
306 Porto-Neto *et al.* (2014) showed that LD dropped below 0.2 at distances of 50 kb.

307 Among those listed in Table2, prominent genes for their reported role in mammalian  
308 fertility including bovine are: *ALDH1A1* (*aldehyde dehydrogenase 1 family member A1*),  
309 *PCSK5* (*proprotein convertase subtilisin/kexin type 5*), and *TSHR* (*thyroid stimulating*  
310 *hormone receptor*), and *IL21* (*Interleukin-21*).

311 The role of *ALDH1A1* during bovine ovarian development has recently been  
312 established (Hatzirodos *et al.* 2019; Hummitzsch *et al.* 2019). Antenos *et al.* (2011) reported  
313 the role of *PCSK5* in mouse ovarian follicle development. Similarly, *TSHR* is a well-known  
314 gene for its function regulating growth, fat metabolism and fertility. Dias *et al.* (2017)  
315 identified a candidate QTL in *TSHR* affecting puberty in five cattle breeds across the taurine  
316 and Indicine lineages: Brangus, Brahman, Nellore, Angus and Holstein. Also, one of the most  
317 prominent selective sweeps found in all domestic chickens occurred at the locus for *TSHR*  
318 (Rubin *et al.* 2010). Finally, the immune system response gene *IL21* has been shown to harbor  
319 selection signatures among divergently selected subpopulations of Polish Red cattle (Gurgul  
320 *et al.* 2019), and among goats and sheep indigenous to a hot arid environment (Kim *et al.*  
321 2016).

322

323

324

## DISCUSSION

325 In this study, we present a rigorous formulation of buffering epistasis due to single

326 loci and how it relates to previous works (Jannink 2007; Crawford *et al.* 2017). Then we

327 present an exact test for association analysis of single locus in buffering epistatic interaction

328 based on bi-variate random regression restricted maximum likelihood (REML) analyses.

329 Methodology for detection of locus by genetic background interactions has been

330 developed at least two times, (sadly) in apparent isolation from each other (Jannink 2007;

331 Crawford *et al.* 2017). Jannink (2007) first and formally derived the linear model involving

332 (additive) genetic background and one locus showing interaction with the background. He

333 showed orthogonality and derived a variance component useful for genome-wide association

334 studies (GWAS), but he did not realize that the model discovered a particular kind of

335 epistasis. Later, the same model was re-derived by Crawford *et al.* (2017) who, however, did

336 not build an orthogonal model (something that may lead to spurious effect estimates), and

337 could not use maximum likelihood estimates. Neither of the two authors explicitly estimated

338 the effect of the epistatic loci. Here, we complete and interpret their work.

339 Then we applied our method to two datasets in cattle. Taking together, our findings in

340 these datasets are striking. Some of our significant genes have been reported as having a

341 statistical *additive* effect in other studies, whereas in ours, they have a statistical *epistatic*

342 effect but not an additive one. As shown by theory, a shift in the mean of the genetic values

343 towards one of the extremes changes the statistical effect from epistatic into additive, whereas

344 the functional effect is always epistatic. For instance, a gene with epistatic buffering effect

345  $k_i = 0.1$  in a population with  $\bar{u} = 0$  will have a statistically null additive effect, whereas the



346 same gene in a population with  $\bar{u} > 0$  will have a positive substitution effect, and a negative  
347 one in a population with  $\bar{u} < 0$ . This explains indeed why some effects change sign when  
348 observed in different genetic backgrounds (Magwire *et al.* 2010).

349 A similar argument explains why we find genes found under selection in a multi-breed  
350 comparison study. These genes are bound to have little variation in their coding region and/or  
351 no additive effect in any given individual breed, because they are fixed or near fixation.  
352 However, inside our populations TC and BB, they are identified as relevant because they have  
353 opposite effects in the extremes of the polygenic background, and they would get alternative  
354 fixation of alleles if the populations were selected towards either extreme. In other words, our  
355 epistatic association analysis can be seen as a selection signature analysis *before* selection of  
356 the extremes.

357 It is somehow difficult to grasp the meaning of the estimate of buffering epistatic  
358 effects, *e.g.*  $\hat{k}_i = 0.53$  (adimensional) in TBX5 in the BB population. For instance, genetic  
359 variation for human height is approximately 39 cm<sup>2</sup> in European populations (Visscher 2008).  
360 Imagine an individual with large total additive genetic value, *i.e.* 4 standard deviations (25 cm  
361 taller than the mean, *i.e.* 190 cm for a woman and 203 cm for a man). If such an individual is  
362 carrier of the “bufferer” copies *and* the allele has a frequency of 0.8 (we will assume that the  
363 bufferer allele is fairly frequent as protective), her/his height changes by  $z_i k_i u = (2 - 2 \times$   
364  $0.8) \times -0.53 \times 25$ , *i.e.* 5.3 centimeters shorter. Still, the estimate of -0.53 is probably too  
365 high – due to the winner’s curse or Beavis effect (Xu 2003).

366 The possibility of detection and further functional analysis of these epistatic loci  
367 implied in buffering mechanisms is of particular relevance in quantitative genetics. As  
368 described in the Introduction, these loci must exist (Mackay 2014), be selected (Flatt 2005)  
369 and they would explain perplexing phenomena: release or maintenance of additive variance

370 (Visser *et al.* 2003; Flatt 2005), (Gimelfarb 1989), “conversion” of epistatic into additive  
371 variance (Mackay 2014) and opposite signs of GWAS associations in different populations  
372 (Huang *et al.* 2012) (Magwire *et al.* 2010).

373 Our model is based on interaction with genetic background, and there is increasing  
374 evidence of dependency of gene substitution on genetic background (Hansen 2013). This  
375 implies, potentially, large changes in gene effects and selection dynamics even if genetic  
376 variance is nearly fully additive at each step (Hansen 2013). Indeed, it has been argued that  
377 epistasis provides the basis of rapid adaptation to new environments (Wright 1931; Mackay  
378 2014).

379 For evolutionary research and plant and animal breeding, there is growing interest in  
380 understanding the extent and mechanisms of epistasis in biology because of the intriguing  
381 prospect of it being an untapped future source of additive variation that may be exploited by  
382 nature and by breeding programs to evolve phenotypes as well as influencing genetic  
383 heterogeneity. Indeed, the role of epistasis in determining which mutations ultimately succeed  
384 or fail in a population under selection remains a central challenge in biology. Buskirk *et al.*  
385 (2017) demonstrated the power of experimental evolution to identify epistatic interactions. In  
386 multi-generation selection programs continued response has been seen, classically for over  
387 100 generations in the Illinois maize kernel content lines , and there have been large and still  
388 continuing genetic improvements in livestock populations, notably in broiler chickens (Hill  
389 2016). Whilst the obvious source of continued response is *de novo* mutation, some of the  
390 additive variation being utilized may have derived from existing mutations whose behavior  
391 changes from epistatic to additive in response to changes in the remainder of the genome,  
392 consistent with the argument of Carlborg *et al.* (2006). Paixão and Barton (2016) argued that  
393 ‘epistasis sustains additive genetic variance for longer: Alleles that were initially deleterious  
394 or near-neutral may acquire favorable effects as the genetic background changes,

395 “converting” epistatic variance into additive, and so prolonging the response to selection’.  
396 Similarly, Hill (2017) concluded that ‘It seems better to concentrate on utilizing additive  
397 variance, and hope for a bonus from converting epistatic variance’.

398 To conclude, our method and our results show promising new perspectives for  
399 research in evolutionary and quantitative genetics based on the study of loci that buffer effect  
400 of other loci.

401

## 402 **ACKNOWLEDGMENTS**

403 Excellent advice and review was provided by Sonja Dominik and Andrew George.  
404 Work supported by INRA SELGEN metaprogram (projects EpiSel and OptiMaGics) and  
405 INRA-CSIRO Linkage Action and SMARTER. Project partly supported by Toulouse Midi-  
406 Pyrénées bioinformatics platform.

407

## 408 **AUTHORS’ CONTRIBUTIONS**

409 AR, JH, KM, ZV and AL derived the equations, wrote the programs to do the  
410 analyses, performed analyses, and assisted drafting the manuscript. L P-N and M N-S  
411 provided sequence-level data, and designed and performed the functional analyses. FR, YL  
412 and NH provided valuable insights throughout the analysis and writing process.

413

414

## 415 **APPENDIX**

### 416 *Technical details for the REML analyses*

417 Because the covariance matrix in the alternative model is not full rank,

418  $\begin{pmatrix} \sigma_u^2 & k_i \sigma_u^2 \\ k_i \sigma_u^2 & k_i^2 \sigma_u^2 \end{pmatrix} = \mathbf{G}_0$ , the reduced rank method of (Meyer and Kirkpatrick 2005) was used

419 (explicitly stating rank equal to 1), and the iterative algorithm was a mixture of PX and AI  
420 (we refer the reader to the Wombat manual for details). Unlike other software programs,  
421 Wombat does not accept centered genotypes as covariates for the random regression model –  
422 only integers  $m = \{1,2,3\}$  for each genotype that are transformed into reals (centered and  
423 scaled) internally. Thus, although the likelihood is in the correct scale, the estimated  $\widehat{\mathbf{G}}_0$  on  
424 output is not. In a model with random regressions,  $\mathbf{y} = \dots + \mathbf{P}\mathbf{u} + \dots$  the covariance across  
425 two points is a function of  $\mathbf{P}\mathbf{K}\mathbf{P}'$  where  $\mathbf{K} = \text{Var}(\mathbf{u})$  is a matrix of covariances and  $\mathbf{P}$  are  
426 covariates. Accordingly, to put back  $\widehat{\mathbf{G}}_0$  in the right scale we need to construct, for each locus  
427  $i$ ,  $\mathbf{P} = \begin{bmatrix} 1 & \bar{m}_i \\ 0 & 1 \end{bmatrix}$  where  $\bar{m}_i = 1 + 2p_i$  is the mean of the regressors  $m = \{1,2,3\}$ . Back  
428 transformation to the regular scale is carried out using  $\widehat{\mathbf{G}}_0 \Leftarrow \mathbf{P}\widehat{\mathbf{G}}_0\mathbf{P}'$  and from here the correct  
429 value  $\widehat{k}_i = \widehat{\mathbf{G}}_0[2,2]/\widehat{\mathbf{G}}_0[1,2]$ .

430

431

## 432 REFERENCES

433

434 Álvarez-Castro J. M., and Ö. Carlborg, 2007 A Unified Model for Functional and Statistical Epistasis  
435 and Its Application in Quantitative Trait Loci Analysis. *Genetics* 176: 1151–1167.

436 <https://doi.org/10.1534/genetics.106.067348>

437 Antenos M., L. Lei, M. Xu, A. Malipatil, S. Kiewewetter, *et al.*, 2011 Role of PCSK5 expression in mouse  
438 ovarian follicle development: identification of the inhibin  $\alpha$ - and  $\beta$ -subunits as candidate  
439 substrates. *PLoS ONE* 6: e17348. <https://doi.org/10.1371/journal.pone.0017348>

440 Boitard S., M. Boussaha, A. Capitan, D. Rocha, and B. Servin, 2016 Uncovering Adaptation from  
441 Sequence Data: Lessons from Genome Resequencing of Four Cattle Breeds. *Genetics* 203:

442 433–450. <https://doi.org/10.1534/genetics.115.181594>

- 443 Bolormaa S., J. E. Pryce, A. Reverter, Y. Zhang, W. Barendse, *et al.*, 2014 A Multi-Trait, Meta-analysis  
444 for Detecting Pleiotropic Polymorphisms for Stature, Fatness and Reproduction in Beef  
445 Cattle. PLOS Genetics 10: e1004198. <https://doi.org/10.1371/journal.pgen.1004198>
- 446 Buskirk S. W., R. E. Peace, and G. I. Lang, 2017 Hitchhiking and epistasis give rise to cohort dynamics  
447 in adapting populations. PNAS 114: 8330–8335. <https://doi.org/10.1073/pnas.1702314114>
- 448 Carlborg Ö., L. Jacobsson, P. Åhgren, P. Siegel, and L. Andersson, 2006 Epistasis and the release of  
449 genetic variation during long-term selection. Nature Genetics 38: 418–420.  
450 <https://doi.org/10.1038/ng1761>
- 451 Cockerham C. C., 1954 An extension of the concept of partitioning hereditary variance for analysis of  
452 covariances among relatives when epistasis is present. Genetics 39: 859.
- 453 Corkery D. P., L. E. Clarke, S. Gebremeskel, J. Salsman, J. Pinder, *et al.*, 2018 Loss of PRP4K drives  
454 anoikis resistance in part by dysregulation of epidermal growth factor receptor endosomal  
455 trafficking. Oncogene 37: 174–184. <https://doi.org/10.1038/onc.2017.318>
- 456 Crawford L., P. Zeng, S. Mukherjee, and X. Zhou, 2017 Detecting epistasis with the marginal epistasis  
457 test in genetic mapping studies of quantitative traits. PLOS Genetics 13: e1006869.  
458 <https://doi.org/10.1371/journal.pgen.1006869>
- 459 Dias M. M., A. Cánovas, C. Mantilla-Rojas, D. G. Riley, P. Luna-Nevarez, *et al.*, 2017 SNP detection  
460 using RNA-sequences of candidate genes associated with puberty in cattle. Genet. Mol. Res.  
461 16. <https://doi.org/10.4238/gmr16019522>
- 462 Fernández M. E., A. Prando, A. Rogberg-Muñoz, P. Peral-García, A. Baldo, *et al.*, 2016 Association of a  
463 region of bovine chromosome 1 (BTA1) with age at puberty in Angus bulls. Reprod. Fertil.  
464 Dev. 28: 1618–1621. <https://doi.org/10.1071/RD14511>

- 465 Flatt T., 2005 The Evolutionary Genetics of Canalization. *The Quarterly Review of Biology* 80: 287–  
466 316. <https://doi.org/10.1086/432265>
- 467 Fontes P. K., R. L. Ereno, A. R. Peixoto, R. F. Carvalho, W. R. Scarano, *et al.*, 2018 Can the antral  
468 follicular count modulate the gene expression of bovine oviducts in Aberdeen Angus and  
469 Nelore heifers? *PLoS ONE* 13: e0202017. <https://doi.org/10.1371/journal.pone.0202017>
- 470 Fortes M. R. S., K. Kemper, S. Sasazaki, A. Reverter, J. E. Pryce, *et al.*, 2013 Evidence for pleiotropism  
471 and recent selection in the PLAG1 region in Australian Beef cattle. *Animal Genetics* 44: 636–  
472 647. <https://doi.org/10.1111/age.12075>
- 473 Gianola D., M. I. Fariello, H. Naya, and C.-C. Schön, 2016 Genome-Wide Association Studies with a  
474 Genomic Relationship Matrix: A Case Study with Wheat and Arabidopsis. *G3: Genes,  
475 Genomes, Genetics* 6: 3241–3256. <https://doi.org/10.1534/g3.116.034256>
- 476 Gimelfarb A., 1989 Genotypic variation for a quantitative character maintained under stabilizing  
477 selection without mutations: epistasis. *Genetics* 123: 217–227.
- 478 Gurgul A., I. Jasielczuk, E. Semik-Gurgul, T. Szmatoła, A. Majewska, *et al.*, 2019 Diversifying selection  
479 signatures among divergently selected subpopulations of Polish Red cattle. *J. Appl. Genet.*  
480 60: 87–95. <https://doi.org/10.1007/s13353-019-00484-0>
- 481 Hansen T. F., 2013 Why Epistasis Is Important for Selection and Adaptation. *Evolution* 67: 3501–3511.  
482 <https://doi.org/10.1111/evo.12214>
- 483 Hatzirodos N., K. Hummitzsch, H. F. Irving-Rodgers, J. Breen, V. E. A. Perry, *et al.*, 2019 Transcript  
484 abundance of stromal and thecal cell related genes during bovine ovarian development. *PLoS  
485 ONE* 14: e0213575. <https://doi.org/10.1371/journal.pone.0213575>

- 486 Hazegh K. E., T. Nemkov, A. D'Alessandro, J. D. Diller, J. Monks, *et al.*, 2017 An autonomous metabolic  
487 role for Spen. *PLOS Genetics* 13: e1006859. <https://doi.org/10.1371/journal.pgen.1006859>
- 488 Hill W. G., 2016 Is Continued Genetic Improvement of Livestock Sustainable? *Genetics* 202: 877–881.  
489 <https://doi.org/10.1534/genetics.115.186650>
- 490 Hill W. G., 2017 “Conversion” of epistatic into additive genetic variance in finite populations and  
491 possible impact on long-term selection response. *Journal of Animal Breeding and Genetics*  
492 134: 196–201. <https://doi.org/10.1111/jbg.12270>
- 493 Höglund J. K., B. Buitenhuis, B. Guldbbrandtsen, M. S. Lund, and G. Sahana, 2015 Genome-wide  
494 association study for female fertility in Nordic Red cattle. *BMC Genetics* 16: 110.  
495 <https://doi.org/10.1186/s12863-015-0269-x>
- 496 Huang W., S. Richards, M. A. Carbone, D. Zhu, R. R. H. Anholt, *et al.*, 2012 Epistasis dominates the  
497 genetic architecture of *Drosophila* quantitative traits. *PNAS* 109: 15553–15559.  
498 <https://doi.org/10.1073/pnas.1213423109>
- 499 Hummitzsch K., N. Hatzirodos, H. F. Irving-Rodgers, M. D. Hartanti, V. E. A. Perry, *et al.*, 2019  
500 Morphometric analyses and gene expression related to germ cells, gonadal ridge epithelial-  
501 like cells and granulosa cells during development of the bovine fetal ovary. *PLoS ONE* 14:  
502 e0214130. <https://doi.org/10.1371/journal.pone.0214130>
- 503 Jannink J.-L., 2007 Identifying Quantitative Trait Locus by Genetic Background Interactions in  
504 Association Studies. *Genetics* 176: 553–561. <https://doi.org/10.1534/genetics.106.062992>
- 505 Kim E.-S., A. R. Elbeltagy, A. M. Aboul-Naga, B. Rischkowsky, B. Sayre, *et al.*, 2016 Multiple genomic  
506 signatures of selection in goats and sheep indigenous to a hot arid environment. *Heredity*  
507 (Edinb) 116: 255–264. <https://doi.org/10.1038/hdy.2015.94>

- 508 Kitano H., 2004 Biological robustness. *Nature Reviews Genetics* 5: 826–837.  
509 <https://doi.org/10.1038/nrg1471>
- 510 Klopocki E., L. M. Neumann, H. Tönnies, H.-H. Ropers, S. Mundlos, *et al.*, 2006 Ulnar-mammary  
511 syndrome with dysmorphic facies and mental retardation caused by a novel 1.28 Mb  
512 deletion encompassing the TBX3 gene. *Eur. J. Hum. Genet.* 14: 1274–1279.  
513 <https://doi.org/10.1038/sj.ejhg.5201696>
- 514 Lahsaee S., D. P. Corkery, L. E. Anthes, A. Holly, and G. Dellaire, 2016 Estrogen receptor alpha (ESR1)-  
515 signaling regulates the expression of the taxane-response biomarker PRP4K. *Experimental*  
516 *Cell Research* 340: 125–131. <https://doi.org/10.1016/j.yexcr.2015.12.013>
- 517 Laird N. M., and J. H. Ware, 1982 Random-effects models for longitudinal data. *Biometrics* 38: 963–  
518 974.
- 519 Littlejohn M. D., K. M. Henty, K. Tiplady, T. Johnson, C. Harland, *et al.*, 2014 Functionally reciprocal  
520 mutations of the prolactin signalling pathway define hairy and slick cattle. *Nature*  
521 *Communications* 5: 5861. <https://doi.org/10.1038/ncomms6861>
- 522 Mackay T. F. C., 2014 Epistasis and Quantitative Traits: Using Model Organisms to Study Gene-Gene  
523 Interactions. *Nat Rev Genet* 15: 22–33. <https://doi.org/10.1038/nrg3627>
- 524 Magwire M. M., A. Yamamoto, M. A. Carbone, N. V. Roshina, A. V. Symonenko, *et al.*, 2010  
525 Quantitative and Molecular Genetic Analyses of Mutations Increasing *Drosophila* Life Span.  
526 *PLOS Genetics* 6: e1001037. <https://doi.org/10.1371/journal.pgen.1001037>
- 527 Mäki-Tanila A., and W. G. Hill, 2014 Influence of Gene Interaction on Complex Trait Variation with  
528 Multilocus Models. *Genetics* 198: 355–367. <https://doi.org/10.1534/genetics.114.165282>



- 529 Marey M. A., M. S. Yousef, J. Liu, K. Morita, M. Sasaki, *et al.*, 2016 Angiotensin II increases sperm  
530 phagocytosis by neutrophils in vitro: A possible physiological role in the bovine oviduct. *Mol.*  
531 *Reprod. Dev.* 83: 630–639. <https://doi.org/10.1002/mrd.22672>
- 532 Matukumalli L. K., C. T. Lawley, R. D. Schnabel, J. F. Taylor, M. F. Allan, *et al.*, 2009 Development and  
533 characterization of a high density SNP genotyping assay for cattle. *PLoS ONE* 4: e5350.  
534 <https://doi.org/10.1371/journal.pone.0005350>
- 535 Meyer K., and M. Kirkpatrick, 2005 Restricted maximum likelihood estimation of genetic principal  
536 components and smoothed covariance matrices. *Genet. Sel. Evol.* 37: 1–30.  
537 <https://doi.org/10.1051/gse:2004034>
- 538 Meyer K., 2007 WOMBAT—A tool for mixed model analyses in quantitative genetics by restricted  
539 maximum likelihood (REML). *J Zhejiang Univ Sci B* 8: 815–821.  
540 <https://doi.org/10.1631/jzus.2007.B0815>
- 541 Paixão T., and N. H. Barton, 2016 The effect of gene interactions on the long-term response to  
542 selection. *Proc. Natl. Acad. Sci. U.S.A.* 113: 4422–4427.  
543 <https://doi.org/10.1073/pnas.1518830113>
- 544 Patterson H., and R. Thompson, 1971 Recovery of inter-block information when block sizes are  
545 unequal. *Biometrika* 58: 545.
- 546 Pausch H., R. Emmerling, H. Schwarzenbacher, and R. Fries, 2016 A multi-trait meta-analysis with  
547 imputed sequence variants reveals twelve QTL for mammary gland morphology in Fleckvieh  
548 cattle. *Genet. Sel. Evol.* 48: 14. <https://doi.org/10.1186/s12711-016-0190-4>

- 549 Portela V. M., P. B. D. Gonçalves, A. M. Veiga, E. Nicola, J. Buratini, *et al.*, 2008 Regulation of  
550 angiotensin type 2 receptor in bovine granulosa cells. *Endocrinology* 149: 5004–5011.  
551 <https://doi.org/10.1210/en.2007-1767>
- 552 Porto-Neto L. R., J. W. Kijas, and A. Reverter, 2014 The extent of linkage disequilibrium in beef cattle  
553 breeds using high-density SNP genotypes. *Genet. Sel. Evol.* 46: 22.  
554 <https://doi.org/10.1186/1297-9686-46-22>
- 555 Porto-Neto L. R., D. M. Bickhart, A. J. Landaeta-Hernandez, Y. T. Utsunomiya, M. Pagan, *et al.*, 2018  
556 Convergent Evolution of Slick Coat in Cattle through Truncation Mutations in the Prolactin  
557 Receptor. *Front. Genet.* 9. <https://doi.org/10.3389/fgene.2018.00057>
- 558 Raidan F. S. S., L. R. Porto-Neto, Y. Li, S. A. Lehnert, and A. Reverter, 2018 Weighting genomic and  
559 genealogical information for genetic parameter estimation and breeding value prediction in  
560 tropical beef cattle. *J Anim Sci* 96: 612–617. <https://doi.org/10.1093/jas/skx027>
- 561 Reverter A., L. R. Porto-Neto, M. R. S. Fortes, P. Kasarapu, M. a. R. de Cara, *et al.*, 2017 Genomic  
562 inbreeding depression for climatic adaptation of tropical beef cattle. *J. Anim. Sci.* 95: 3809–  
563 3821. <https://doi.org/10.2527/jas2017.1643>
- 564 Reverter A., J. Henshall, L. Porto-Neto, F. Raidan, Y. Li, *et al.*, 2018 A rapid method for the  
565 identification of epistatic ‘dormant’ SNPs. *Proceedings of the World Congress on Genetics  
566 Applied to Livestock Production Methods and Tools-GWAS*: 260.
- 567 Rubin C.-J., M. C. Zody, J. Eriksson, J. R. S. Meadows, E. Sherwood, *et al.*, 2010 Whole-genome  
568 resequencing reveals loci under selection during chicken domestication. *Nature* 464: 587–  
569 591. <https://doi.org/10.1038/nature08832>

- 570 Schaeffer L. R., 2004 Application of random regression models in animal breeding. *Livestock*  
571 *Production Science* 86: 35–45. [https://doi.org/10.1016/S0301-6226\(03\)00151-9](https://doi.org/10.1016/S0301-6226(03)00151-9)
- 572 Storey J. D., 2002 A direct approach to false discovery rates. *Journal of the Royal Statistical Society:*  
573 *Series B (Statistical Methodology)* 64: 479–498. <https://doi.org/10.1111/1467-9868.00346>
- 574 VanRaden P. M., 2008 Efficient Methods to Compute Genomic Predictions. *J. Dairy Sci.* 91: 4414–  
575 4423.
- 576 Visscher P. M., 2008 Sizing up human height variation. *Nature Genetics* 40: 489–490.  
577 <https://doi.org/10.1038/ng0508-489>
- 578 Visser J. A. G. M. de, J. Hermisson, G. P. Wagner, L. A. Meyers, H. Bagheri-Chaichian, *et al.*, 2003  
579 Perspective: Evolution and Detection of Genetic Robustness. *Evolution* 57: 1959–1972.  
580 <https://doi.org/10.1111/j.0014-3820.2003.tb00377.x>
- 581 Vitezica Z. G., A. Legarra, M. A. Toro, and L. Varona, 2017 Orthogonal Estimates of Variances for  
582 Additive, Dominance and Epistatic Effects in Populations. *Genetics* genetics.116.199406.  
583 <https://doi.org/10.1534/genetics.116.199406>
- 584 Wright S., 1922 Coefficients of inbreeding and relationship. *Am. Nat.* 56: 330–338.
- 585 Wright S., 1931 Evolution in Mendelian Populations. *Genetics* 16: 97–159.
- 586 Xu S., 2003 Theoretical Basis of the Beavis Effect. *Genetics* 165: 2259–2268.
- 587
- 588
- 589

590 **TABLES**

591

592 **Table 2.** Number of significant epistatic SNP (N) and false discovery rate (FDR) at

593 decreasing levels of *P*-value for the Brahman and Tropical Composite populations.

| <i>P</i> -value | Brahman |        | Tropical Composite |        |
|-----------------|---------|--------|--------------------|--------|
|                 | N       | FDR, % | N                  | FDR, % |
| < 0.05          | 66,789  | 46.06  | 87,545             | 36.21  |
| < 0.01          | 20,542  | 31.01  | 30,803             | 21.61  |
| < 0.005         | 12,503  | 25.67  | 19,831             | 16.98  |
| < 0.001         | 3,679   | 17.62  | 6,972              | 9.80   |
| <0.0005         | 2,186   | 14.85  | 4,484              | 7.64   |
| <0.0001         | 662     | 9.83   | 1,571              | 4.38   |
| <0.00005        | 384     | 8.47   | 1,028              | 3.35   |
| <0.00001        | 91      | 7.15   | 342                | 2.02   |

594

595 **Table 3.** Annotation of SNP with significant ( $P < 0.001$ ) epistatic effect in both populations (Brahman and Tropical Composite) including  
596 genome position, distance to nearest gene, gene, reference allele frequency (RAF), estimated effect and significance ( $-\text{Log}(P)$ ).

| SNP                   | Chr | Bp         | Distance | Gene                | Brahman |         |                  | Tropical Composite |         |                  |
|-----------------------|-----|------------|----------|---------------------|---------|---------|------------------|--------------------|---------|------------------|
|                       |     |            |          |                     | RAF     | Effect  | $-\text{Log}(P)$ | RAF                | Effect  | $-\text{Log}(P)$ |
| BovineHD0200001651    | 2   | 5,747,611  | 38,487   | NEMP2               | 0.0263  | -0.5406 | 3.0404           | 0.0729             | 0.3258  | 3.5760           |
| BovineHD0200001652    | 2   | 5,748,515  | 37,583   | NEMP2               | 0.0263  | -0.5406 | 3.0404           | 0.0727             | 0.3237  | 3.5065           |
| BovineHD0200001654    | 2   | 5,757,112  | 28,986   | NEMP2               | 0.9737  | 0.5433  | 3.0404           | 0.9272             | -0.3234 | 3.5297           |
| ARS-BFGL-NGS-100083   | 8   | 11,133,497 | 0        | SCARA3              | 0.9528  | -0.5113 | 3.4369           | 0.6920             | 0.1975  | 4.1983           |
| BovineHD0800014800    | 8   | 49,143,207 | 36,501   | ALDH1A1             | 0.9820  | 0.7474  | 3.5992           | 0.7831             | 0.2002  | 3.9915           |
| BovineHD0800015819    | 8   | 52,427,816 | 8,480    | PCSK5               | 0.0452  | -0.4416 | 3.3439           | 0.2349             | -0.1963 | 3.6686           |
| Hapmap48089-BTA-81187 | 8   | 52,524,895 | 0        | GCNT1               | 0.9403  | 0.3760  | 3.0638           | 0.6829             | 0.1562  | 3.2041           |
| BovineHD1000026980    | 10  | 92,312,649 | 0        | TSHR                | 0.6054  | 0.2160  | 3.5761           | 0.4686             | -0.1712 | 4.0605           |
| BovineHD1000026985    | 10  | 92,331,573 | 0        | TSHR                | 0.3946  | -0.2140 | 3.5761           | 0.5317             | 0.1779  | 4.1064           |
| BovineHD1000030828    | 10  | 92,335,071 | 0        | TSHR                | 0.4216  | -0.2017 | 3.2507           | 0.7002             | 0.1623  | 3.2973           |
| BovineHD1200025989    | 12  | 84,830,432 | 15,785   | 5S_rRNA             | 0.7141  | 0.2066  | 3.2041           | 0.6998             | -0.1603 | 3.0872           |
| BovineHD1400011237    | 14  | 37,055,691 | 0        | ENSBTAG00000002076  | 0.1033  | -0.3042 | 3.0404           | 0.5288             | -0.1442 | 3.0872           |
| BovineHD1400011280    | 14  | 37,211,716 | 0        | ENSBTAG000000050514 | 0.9095  | 0.3733  | 3.9915           | 0.6543             | 0.2204  | 5.9710           |
| BovineHD1400013234    | 14  | 44,638,868 | 5,792    | PMP2                | 0.6080  | 0.1951  | 3.0169           | 0.6512             | -0.1791 | 3.9225           |
| BovineHD1600016214    | 16  | 56,665,443 | 0        | TNR                 | 0.1409  | 0.2618  | 3.0872           | 0.6231             | -0.1635 | 3.6917           |
| BovineHD1700009805    | 17  | 35,070,459 | 0        | IL21                | 0.9377  | 0.4452  | 3.7841           | 0.7129             | -0.1633 | 3.2973           |
| BovineHD1700009807    | 17  | 35,079,284 | 8,519    | IL21                | 0.0623  | -0.4429 | 3.7610           | 0.2859             | 0.1659  | 3.2274           |
| BovineHD1700009808    | 17  | 35,083,771 | 13,006   | IL21                | 0.0623  | -0.4429 | 3.7610           | 0.2859             | 0.1659  | 3.2274           |
| BovineHD1700009811    | 17  | 35,094,499 | 23,734   | IL21                | 0.9377  | 0.4452  | 3.7841           | 0.7131             | -0.1626 | 3.2740           |
| BovineHD1900012991    | 19  | 45,742,542 | 18,774   | ENSBTAG000000053203 | 0.2399  | 0.2629  | 3.5297           | 0.3921             | -0.1908 | 4.5416           |
| BovineHD4100015365    | 21  | 65,988,493 | 33,080   | bta-mir-656         | 0.0559  | 0.4343  | 3.1340           | 0.0502             | -0.4564 | 5.9259           |
| BovineHD2500009619    | 25  | 34,418,988 | 0        | SSC4D               | 0.1843  | 0.3028  | 3.6455           | 0.4378             | -0.1702 | 3.8764           |
| BovineHD2500009621    | 25  | 34,427,964 | 0        | SSC4D               | 0.1831  | 0.3168  | 3.8764           | 0.3959             | -0.2030 | 4.9974           |
| BovineHD2800005959    | 28  | 22,571,976 | 0        | CTNNA3              | 0.1338  | 0.3147  | 3.1807           | 0.3500             | 0.1516  | 3.2973           |

597

598

599  
600  
601

## FIGURES

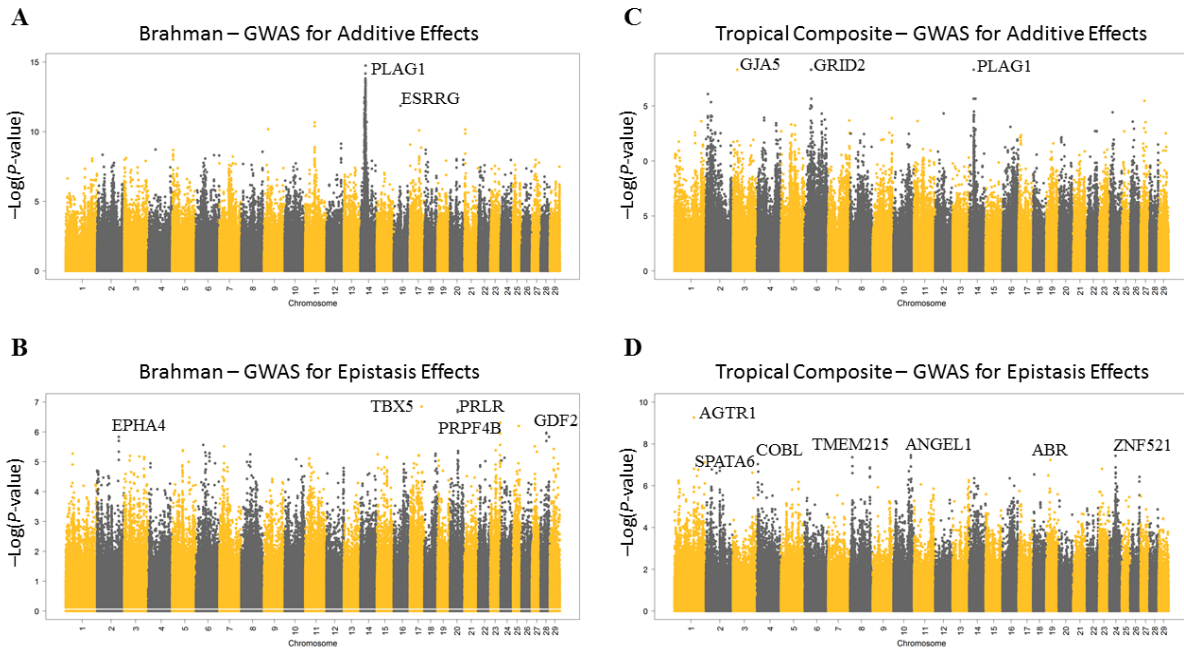

602  
603  
604  
605  
606  
607  
608  
609  
610

**Figure 1.** Genome-wide additive and epistasis association: Manhattan plots of the additive (A and C) and epistatic (B and D) association of SNPs across the 29 bovine autosomal chromosomes for the Brahman (A and B) and Tropical Composite (C and D) populations. The most likely candidate genes in the most significantly associated regions are annotated where an obvious candidate could be identified according to the bovine reference genome assembly ARS-UCS1.2. SNPs on odd-numbered chromosomes are in black and those on even-numbered chromosomes are in yellow.

611

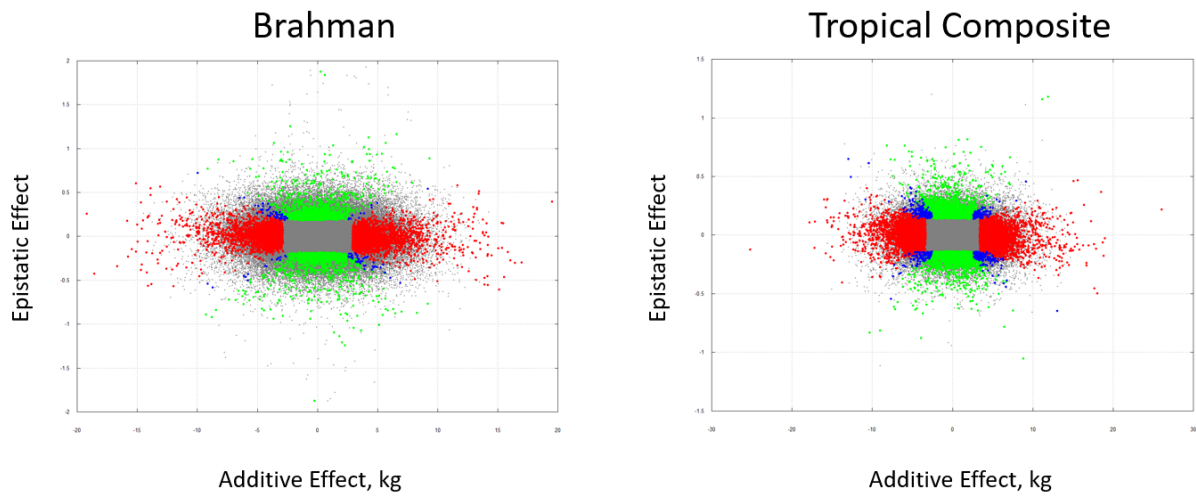

612

613 **Figure 2.** Scatter plot of the relationship between SNP additive (x-axis) and epistatic effects  
614 (y-axis) for the Brahman (left panel) and Tropical Composite (right) populations. Red, green  
615 and blue indicate significance ( $P$ -value  $< 0.001$ ) for additivity, epistatic and both,  
616 respectively.

617

618

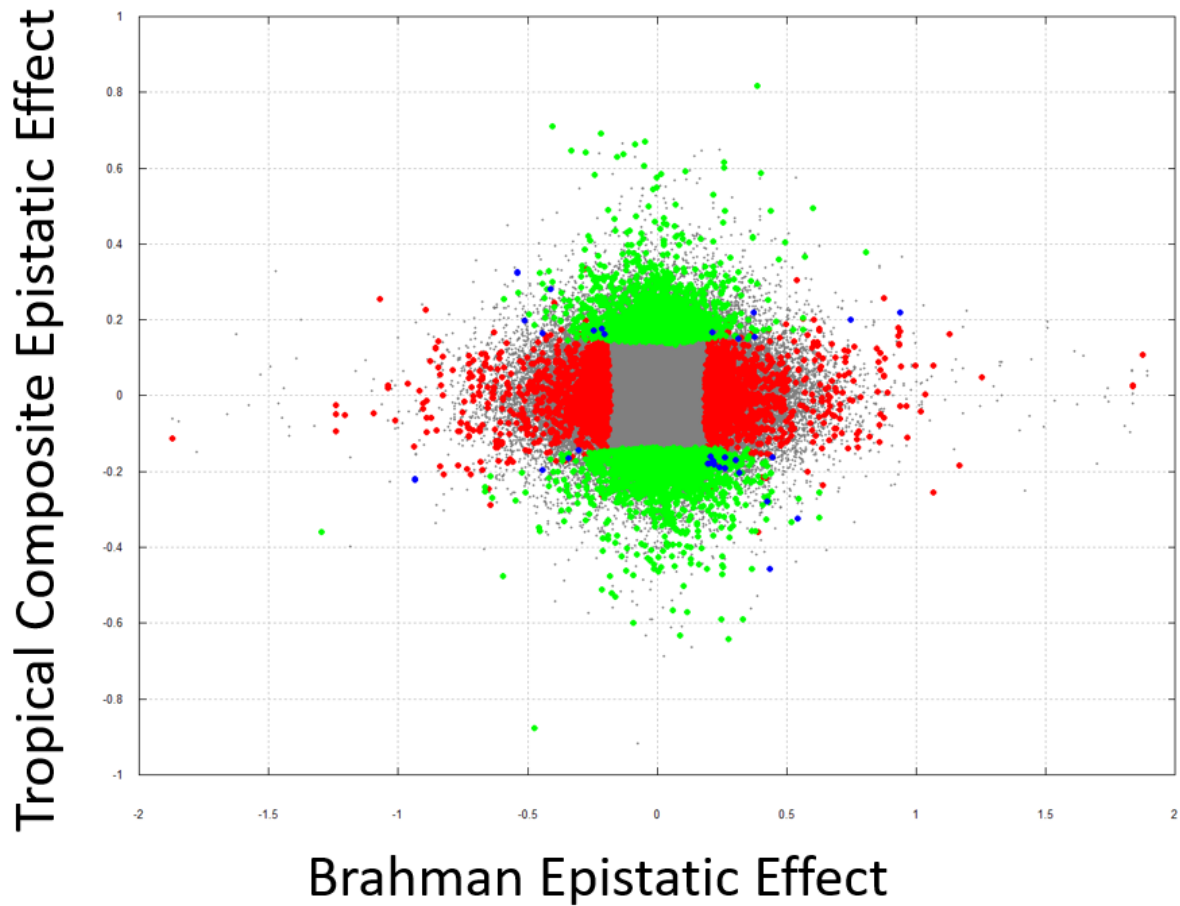

619

620 **Figure 3.** Scatter plot of the relationship between SNP epistatic effect in the Brahman (x-axis)

621 and Tropical Composite (y-axis) populations. Red, green and blue indicate significance (P-

622 value < 0.001) in the Brahman, Tropical Composite, and both populations, respectively.

623
